# Supplementary material for: Consideration of NDVI Thematic Changes on Density Analysis and Floristic Composition of Wadi Yalamlam, Saudi Arabia
Source: Copernicus journal article supplement (doi:10.5194/gi-2018-30), 2018-07-03
Supplement: Supplementary file [file gi-2018-30-RC1-supplement.pdf]

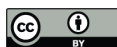

1 **Consideration of NDVI Thematic Changes on Density Analysis and Floristic Composition**  
2 **of Wadi Yalamlam, Saudi Arabia**

3 **Amal Y. Aldhebiani<sup>1</sup>, Mohamed Elhag<sup>2</sup>, Ahmad K. Hegazy<sup>3</sup>, Hanaa K. Galal<sup>1,4</sup>, Norah S.**  
4 **Mufareh<sup>1</sup>**

5 <sup>1</sup>Biological Sciences Department, Faculty of Science, King Abdulaziz University, Jeddah 21589,  
6 Saudi Arabia

7 <sup>2</sup>Department of Hydrology and Water Resources Management, Faculty of Meteorology,  
8 Environment & Arid Land Agriculture, King Abdulaziz University Jeddah, 21589. Saudi Arabia.

9 <sup>3</sup>Department of Botany, Faculty of Science, Cairo University, Giza, Egypt

10 <sup>4</sup>Botany Department, Faculty of Science, Assiut University, Assiut, Egypt

11 *Correspondence to: [melhag@kau.edu.sa](mailto:melhag@kau.edu.sa)*  
12

13 **Abstract**

14 **Wadi Yalamlam is known as one of the significant Wadies in the west of Saudi Arabia. It is a**  
15 **very important water source for the western region of the country. Thus, it supplies the holy**  
16 **places in Mecca and the surrounding areas with drinking water. Floristic composition of Wadi**  
17 **Yalamlam has not been comprehensively studied. For that reason, this work aimed to assess the**  
18 **Wadi vegetation cover, life-form, chorotype, diversity, and community structure. The Wadi was**  
19 **divided into seven stands. Stands 7, 1 and 3 were the richest with the highest Shannon index**  
20 **2.98, 2.69 and 2.64 respectively. On the other hand, stand 6 has the least plant biodiversity with**  
21 **Shannon index of 1.8. The study also revealed the presence of 48 different plant species**  
22 **belonging to 24 families. Fabaceae (17%) and Poaceae (13%) were the main families that form**  
23 **most of the vegetation in the study area, while many families were represented only by 2% of the**  
24 **vegetation of the Wadi.**

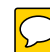



25 **Keywords:** Floristic composition, Plant diversity, Species richness, Wadi Yalamlam, Saudi  
26 Arabia.

## 271. Introduction

28 Kingdom of Saudi Arabia is a big desert with a land area of approximately 2,250,000 km<sup>2</sup>  
29 comprising the basic area of the Arabian Peninsula. Based on that, xerophytic vegetation forms  
30 the distinguished topographies of the plant life in the country (Khalik et al., 2013). According to  
31 Abuzinadah *et al.* (Abuzinada et al., 2005), the natural areas and the biological diversity are very  
32 large in the kingdom, and these factors are very important for dealing with ecosystems. The  
33 vegetation structure in Saudi Arabia presents differences in the distributional manner and that's  
34 rising from changes in different factors and resources such as weather and soil variables,  
35 anthropogenic pressures and water (Hegazy et al., 2007).

36 The geographical location of Saudi Arabia between the surrounding continents indicates the  
37 importance of the vegetation structure in the kingdom. Hence the flora contains different global  
38 elements such as the Palearctic (located in Asia and Europe) the Afrotropical (located in Africa)  
39 and the Malayan-Indo worldly (Ghazanfar, 2006). Saudi Arabia has three categories of species  
40 called: Sudano-Deccanian, Saharo Sindian, and Tropical Indian – African (Alfarhan, 1999,  
41 Thomas et al., 2008). According to Collenette (Collenette, 1998), some areas in Saudi Arabia  
42 like Asir, Alhejaz and western Mountains have high floristic diversity. These mountains chains  
43 are near the Red Sea and it have the greatest level of rainfall. The height of these mountains  
44 reaches up to 2850m. Some researchers prove that the topography and climate of the area are  
45 affecting the level of speciation (Abulfatih, 1992, El-Kady et al., 1995, Shaltout and Mady, 1996,  
46 Shaltout et al., 1997). The flora of Saudi Arabia is reasonably well identified at the taxonomic  
47 level. The species richness of the 15 Protected Areas  rolled by the National Commission for

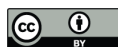

48 Wildlife Conservation and Development, as well as many of the zones protected by the  
49 administration of the Ministry of Agriculture, is somehow well documented in the work of  
50 Forbis (Forbis et al., 2006), but this is more than ten years ago. The number of the verified  
51 species in Saudi Arabia is growing day by day based on the recent field trips and biodiversity  
52 studies. An example is that over 1500 species was recorded by Migahid [17] between the years  
53 1974-1988. Far ahead, this number was upraised to 2300 within a period of about three decades;  
54 according to the accounts given in the Flora of Saudi Arabia (Chaudhary, 1999, Chaudhary,  
55 2000, Alfarhan et al., 2005, Masrahi et al., 2012). Several scholarly works are available on the  
56 flora of Saudi Arabia. of the most comprehensive works on the Flora of Saudi Arabia are:  
57 Flora of Saudi Arabia by Migahid (Migahid, 1978) which have been published four times and the  
58 three-volume book of Flora of the Kingdom of Saudi Arabia done by Chaudhary (Chaudhary,  
59 1999, Chaudhary, 2000). There are some studies on different areas of Saudi Arabia such as  
60 Shultz and Whitney (Schulz and Whitney, 1986) have studied the vegetation and floras of the  
61 sabkhas, hillocks and other prominent mountains of the Najd region “Twaik, Aja, and Salma”.  
62 Considerable efforts have also been made toward the elucidation of vegetation–environmental  
63 relationships in the ecosystems “raudhas” or depressions (Shaltout and Mady, 1996, Sharaf El  
64 Din et al., 1999, Alfarhan, 2001). The plant communities of Wadies have been recorded in some  
65 studies like Wadi Al-Ammaria by Al-Yemeni (Al-Yemeni, 2001) and Wadi Hanifa by Taia and  
66 El-Ghanem (Taia and El-Ghanem, 2001) and El-Ghenem (El-Ghanem, 2006). But no previous  
67 study has been done on the flora of Wadi Yalmlam.  
68 Therefore, the aim of the current research study is to study the vegetation cover in Wadi  
69 Yalamlam from different aspects, such as species richness, life form, and biodiversity in relation  
70 habitat change in the study area. Normalized Difference Vegetation Index has been conducted

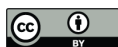

71 from a temporal remote sensing data to assess the status of the vegetation cover within the  
72 designated study area over the last four years. Moreover, species diversity indices have been  
73 used to discriminate vegetation sets and to evaluate the relation between the vegetation aspects in  
74 the study area.

## 75 **2. Materials and Methods**

### 76 **2.1 Study Area**

77 The location of Wadi Yalamlam is about 100 km south Mecca city between 20° 26':21° 8'N; 39°  
78 45':40° 29'E (Figure 1). The Wadi basin covers a large area of about 180,000 hr. The border of  
79 the basin located in downstream is expanded to comprise almost nearly all the flat area in the  
80 lower part. Wadi Yalamlam initiats from the high altitude of Hijaz mountains near Taif exactly  
81 from AlShafa area. Its average annual rainfall is c.140mm. The Wadi has different altitudes  
82 greatly varying from 2850 m to 25 m (a.s.l.) in upstream and downstream areas, respectively..  
83 The main route of Wadi Yalamlam is traversed by the greatly cracked granitoides, gabbroic and  
84 metamorphic rocks until it reaches the Red Sea coastal plain and its about 120 km in length.  
85 Incisive natural vegetation covers the higher and the central parts of the basin. On the other hand,  
86 Quaternary deposits and sand dunes accompanied by tiny scattered vastly alter the granitoids and  
87 metamorphosed basaltic hills which are the constitutes of the lower part of the Wadi. Several  
88 basic ditches are observed in the lower part of the basin. Moreover, the depth of the Quaternary  
89 deposits of the Wadi is larger in the lower part.

90

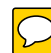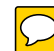

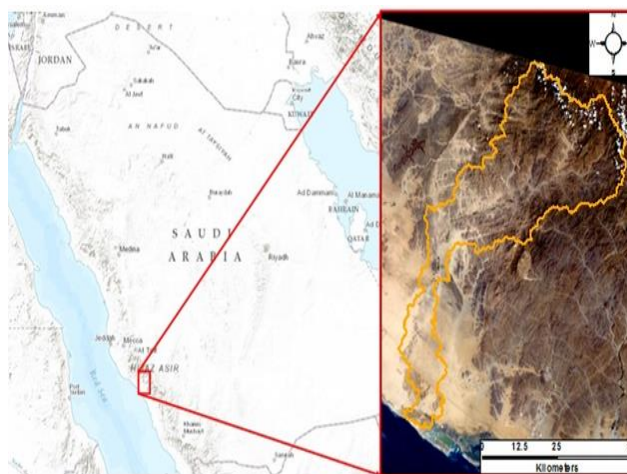

91

92

**Figure 1. Location of the study area (Bahrawi et al., 2016).**

93

### **2.2 Climate of the Study Area:**

94

The climate of the Red Sea coast is usually stable as the weather is cold in the winter season and

95

warm in the summer. Based on the weather recorded, the average maximum temperature is

96

between 37-39 °C and the minimum temperature is around 19 °C. The highest temperature was

97

49°C and the lowest was 12°C. The maximum average of evaporation value is between 450 to

98

550mm in summer, while in winter it's around 200mm (Subyani and Bayumi, 2003).

99

### **2.3 Sample sites**

100 Samples were chosen along Wadi Yalamlam areas such as (Figure 2):

101

- Upstream midstream

102

- Downstream parts

103

- And different Wadi streams

104

The study area was visited from the beginning of March 2015 to the end of February 2016.

105

Almost seven stands were randomly chosen in every area for the current investigation during

106

different growing seasons.



107 Locations and samples were selected as an example of a large range of physiographic and  
108 environmental variability in every branch.

109 Sample plots were randomly selected using the relevé process in every site described by  
110 Mueller- Dombois and Ehlenberg (Mueller-Dombois and Ellenberg, 1974).

111  The plots were 10-meter × 10 meters and samples were taken through the spring season when  
112 taxa were expected to be growing and flowering. The vegetation sampling included recording  
113 all plant taxa in the plots. 

114 The plant cover of each taxa was estimated using the Zurich- Montpellier technique (Braun-  
115 Blanquet et al., 1965). The collected sample specimens were recognized according to  
116 Collenette (Collenette, 1999), Cope (Cope, 1985), Rahman *et al.* (Rahman et al., 2004), and  
117 Chaudhary (Chaudhary, 1999, Chaudhary, 2000).

#### 118 ***2.4 Realization of Species Richness Equations***

119 Various indices have been developed for examining species richness in a region based on the  
120 estimations of the relative abundance of the species derived from samples (Heip et al., 1998).  
121 Among these indices are the Shannon-Wiener information function (Lloyd et al., 1968), the  
122 Simpson's dominance index  (Hunter and Gaston, 1988), the Margalef species richness index  
123 (Meurant, 2012), and Pielou evenness index (Pielou, 1966). The first two were used in the  
124 current study due to feasibility reasons.

125

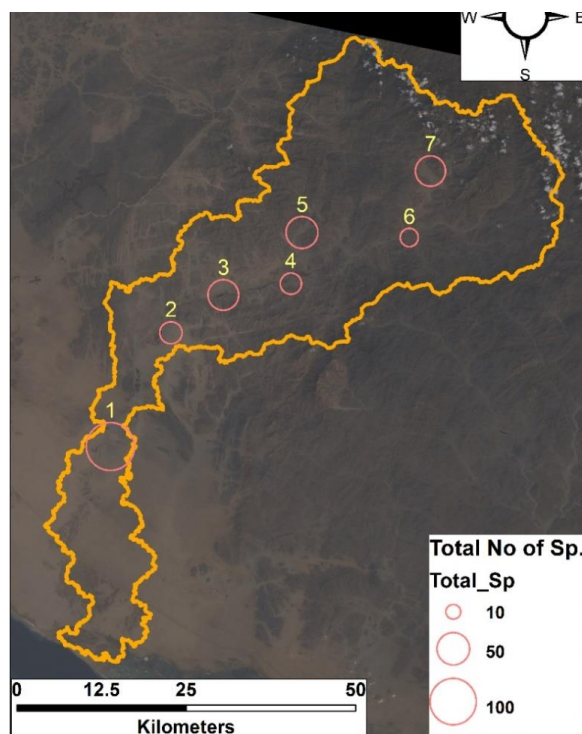

126

127

**Figure 2. A total number of species in Wadi Yalamlam.**

128 **2.4.1 The Shannon index**

129 The main principle of this index is that the diversity of a community is the amount of data in a  
130 code. It is calculated as follows:

131 
$$H = -\sum_{i=1}^S (p_i \times \ln p_i) = -\sum_{i=1}^S \left(\frac{n_i}{N} \times \ln \frac{n_i}{N}\right)$$
 Eq.1

132 In this formula,  $S$  is the total number of species

133  $N$  is the total number of individuals

134  $n_i$  is the number of individuals of the  $i$ -th species.

135  $\frac{n_i}{N}$  is equivalent to  $p_i$ , the probability of finding the  $i$ -th species.

136 **2.4.2 Simpson's index**



137 Simpson's approach for assessing species diversity evaluates the dominance of a species relative  
138 to the number of species in a sample or population (Hunter and Gaston, 1988). It is calculated as  
139 follows:

$$140 \quad D = [\sum n_i (n_i - 1)] / N (N - 1) \quad \text{Eq.2}$$

141 D is the Simpson Diversity Index,  
142  $n_i$  is the Number of individuals belonging to  $i$  species,  
143 N is the Total number of individuals

144

#### 145 **2.5. Density Analysis**

146 The new improvements in remote sensing and in GIS resulted in advanced alternative methods  
147 for representing vegetation maps far from regular field surveys and photo analysis. Predictive  
148 vegetation modeling is considered as one of the commonly used methods. It is described as  
149 "predicting the distribution of vegetation across a landscape based on the relationship between  
150 the spatial distribution of vegetation and certain environmental variables" (Franklin, 1995,  
151 Guisan and Zimmermann, 2000). Concepts of spatial variations are obtained according to the  
152 following equations:

$$153 \quad \gamma(k) = \frac{1}{2n(k)} * \sum_{i=1}^{2(k)} [Z(x_i) - Z(x_{i+k})]^2 \quad \text{Eq.3}$$

154 Where:  $n(k)$  is the number of pairs of observation;  
155  $Z(x_i)$  is the feature property measured in point  $x$ , and in point  $x + k$ .

$$156 \quad Z^*(x_0) = \sum_{i=1}^n \lambda_i * Z(x_i) \quad \text{Eq.4}$$

157  
158 Where:  $Z^*(x_0)$  is the interpolated value of variable  $Z$  at location  
159  $x_0$ ,  $Z(x_i)$  is the values measured at location  $x_i$ ,





160  $\lambda_i$  is the weighed coefficients calculated based on the semivariogram when:

$$161 \sum_{i=1}^n \lambda_i = 1$$

162 Consequently, it is possible to obtain non-biased interpolated values that is, the expected value:

163  $E[Z^*(x_o) - Z(x_o)] = 0$  and the estimated variance  $Var. [Z^*(x_o) - Z(x_o)] = \text{minimum}$  (Elhag and

164 Bahrawi, 2016).

165

166 The relationship between environment and vegetation could be associated with the observed

167 connection or to the hypothetical or investigational physiological limitations of diverse plant

168 taxa. This relationship has been calculated using statistical methods. These statistical methods

169 have become gradually more flexible to show what is known as non-Gaussian species response

170 curves (Heath and Smith, 1989).

171

## 172 **2.6. NDVI Change Detection**

173 The multispectral remote sensing data image was obtained from the United States Geological

174 Survey (USGS). Landsat-8 images are consisting of nine spectral bands ranging from Visible to

175 Thermal Infrared with a spatial resolution of 30 meters for Bands from 1 to 7 and then 9. The

176 resolution for the panchromatic Band 8 is 15 meters. Spectral bands are selectable across the

177 range: 435 nm to 1251. The temporal data sets were acquired in April 2013 as an early data of

178 acquisition and in April 2017 as a late date of acquisition (Path, 169; Row, 46).

179 There are quite a few indices for defining vegetation behavior zones on a remote sensing

180 imagery. One of which is NDVI (Bhandari et al., 2012). It is a crucial and commonly used

181 vegetation index. In addition, it is widely applied to research works related to climatic and global

182 environmental changes (Bhandari et al., 2012). NDVI can be estimated as a ratio variance



183 between measured canopy reflectance in the red and near-infrared bands respectively (Elhag and  
184 Bahrawi, 2017).

185 In other words, NDVI is a simple numerical indicator which by using a remote platform can  
186 analyze the remote sensing measurements to decide whether the target or object being observed  
187 comprehends live green vegetation or not. It can be calculated as follows (Jensen and Binford,  
188 2004);

189  $NDVI = \frac{NIR-RED}{NIR+RED}$

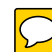

190 taking into consideration ( $-1 < NDVI > 1$ )

191 Where:

192 NIR band = (750-1300 nm),

193 Red band = (600-700 nm)

194

195 **3. Results and Discussion**

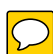

196 **3.1 Floristic analysis and plant diversity of the study area:**

197 Vegetation in the seven stands was represented by 48 species belonging to 24 families. The  
198 families Fabaceae and Poaceae were the richest (17%), (13%) followed by Zygophyllaceae  
199 (10%), Cucurbitaceae (10%) and Euphorbiaceae (6%), Asclepiadaceae, Molluginaceae,  
200 Cleomaceae, Solanaceae and Caryophyllaceae (4%), and 14 families were represented by only  
201 (2%) of the vegetation of the Wadi (Figures 3 and 4).

202 Many studies and comparisons of families about the largest number of species were listed in  
203 various regions of Saudi Arabia such as Asir Mountains in Hosni and Hegazi, (Hosni and  
204 Hegazy, 1996), Mosallam (Mosallam, 2007) who studied Taif area, Alatar *et al.*, (Alatar *et al.*,  
205 2012) in Al-Jufair Wadi and Al-Turki and Al-Olayan (Al-Turki and Al-Olayan, 2003) in Hail



206 region. As well as similar to these studies and results were recorded outside the kingdom like  
207 Egypt (El-Ghani and Abdel-Khalik, 2006, El-Ghani and El-Sawaf, 2004) and Jebel Marra in  
208 Al Sudan (Al-Sherif et al., 2013). The most famous plant species in Saudi Arabia belong to the  
209 families Fabaceae and Asteraceae (Migahid, 1978, Chaudhary, 1999, Rahman et al., 2004). As  
210 the Poaceae is the largest family listed in some researchers but there are also other large families  
211 in the flora of Saudi Arabia (Collenette, 1999, Alnafie, 2008).

212 Stand 1 was the most diverse with about 28 different taxa, followed by stand 7 about 22 different  
213 taxa because it is surrounded and near the water dam. Whereas, stand 6 was least diverse with 7  
214 taxa only.

215

### 216 ***3.2 Plant growth form of the study area:***

217 It was observed that herbs dominated the vegetation of the study area (48%) followed by shrubs  
218 (19%), grass (11%) shrubs to trees (10%) and subshrubs (6%) (Figure 5). The higher number of  
219 species belonged to the herbs followed by grasses, shrubs, and trees. These observations of many  
220 differences in vegetation cover composition and structure can be endorsed to inundation,  
221 competition and the environmental factors that might affect vegetation communities on the wadi  
222 (Lenssen et al., 1999, Zhang et al., 2005). The difference in density, frequency, and abundance  
223 between taxa might be referred to the variation in the habitat (Nardi et al., 2016).

### 224 ***3.3 Plant life form of the study area***

225 The life form range of the study area showed predominance of therophytes and chamaephytes  
226 which were constituted 31% and 29% of the total flora, respectively, followed by phanerophytes  
227 19%, while hemicryptophytes are 17%. Then both geophytes and epiphyte represent 2% of the  
228 total flora as shown in Figure 6. Life-form spectrum in the study area is distinguished by an arid



229 desert region with the dominance of therophytes. This result supports the theory of Cain (Cain,  
230 1950) and Deschenes (Deschenes, 1969) which states that “dry climate, overgrazing, and  
231 trampling which is so prevalent on grasslands, tend to increase the percentage of therophytes  
232 through the introduction and spread of weedy grasses and forbs of this life form”. Furthermore,  
233 the high percentage of therophytes could be also regarding human activities as claimed by  
234 Barbero *et al.* (Barbero *et al.*, 1990). Therophytes (annuals and biennials) are not unexpectedly  
235 recorded for 60% of the overall taxa of the region. They generally bloom and form well-  
236 developed growth in the wadis and at the base of steady dunes, where water gathers after  
237 appropriate rain. Moreover, it is essential to specify that the dominance of both Fabaceae and  
238 therophytes in a local flora can be an indicator of the relative index of disturbance for  
239 Mediterranean ecosystems (El-Ghani and Abdel-Khalik, 2006). These results are in agreement  
240 with the life form scales among desert habitats in further parts of Saudi Arabia (El-Demerdash *et*  
241 *al.*, 1994, Collenette, 1999, Chaudhary, 2000, Al-Turki and Al-Olayan, 2003, El-Ghanim *et al.*,  
242 2010, Alatar *et al.*, 2012, Daur, 2012).

243

#### 244 ***3.4 Species richness of the study area***

245 The values of Shannon index in the study area are as follows: 1.8 (stand 6), 2.20 (stand 4) and  
246 the highest values reach up to 2.69 (stand1), 2.64 (stand 3) and 2.98 (stand 7) (Figure 7).  
247 Shannon index examination demonstrates a high species diversity. Typically, the Shannon index  
248 in real ecosystems ranges between 1.5 and 3.5 (Macdonald and Macdonald, 2003). The value  
249 rarely surpasses 4 (Margalef, 1972).

250 The value of Simpson's ranges from 0 to 1. With this index, 0 represents infinite diversity and, 1,  
251 no diversity. That is, the bigger the value the lower the diversity (Hunter and Gaston, 1988).

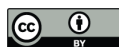

252 Simpson's results in the study area showed that the values of the index are 0.88 (stand 1, 5 and  
253 6), 0.92 (stand 4), 0.94 (stand 3), 0.95 (stand 2) and 0.96 (stand 7) (Figure 7). Which means that  
254 stands 1,5 and 6 have the highest in biodiversity while the lowest is stand 7.

### 255 ***3.5 Plant density mapping of the study area***

256

257

258

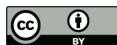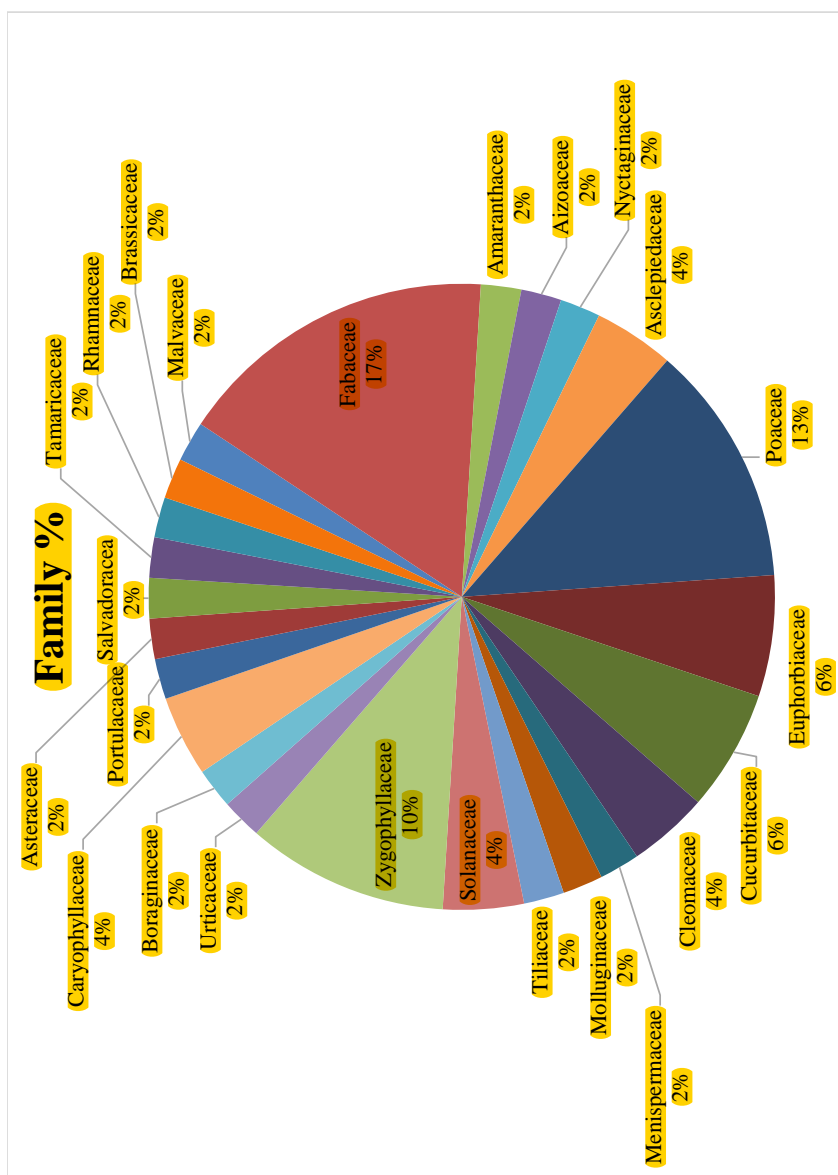

Figure 3. Floristic richness - diversity of the studied area.

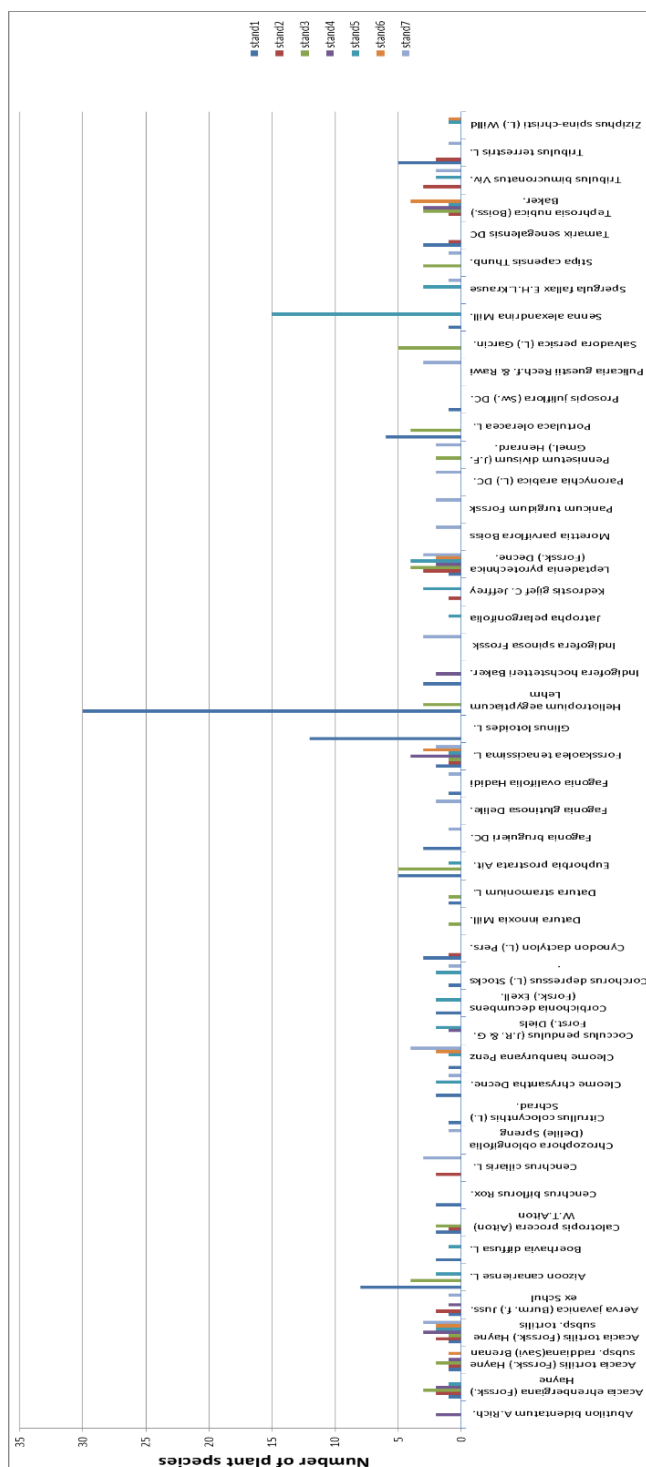

Figure 4. Floristic diversity at the studied sites.

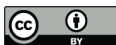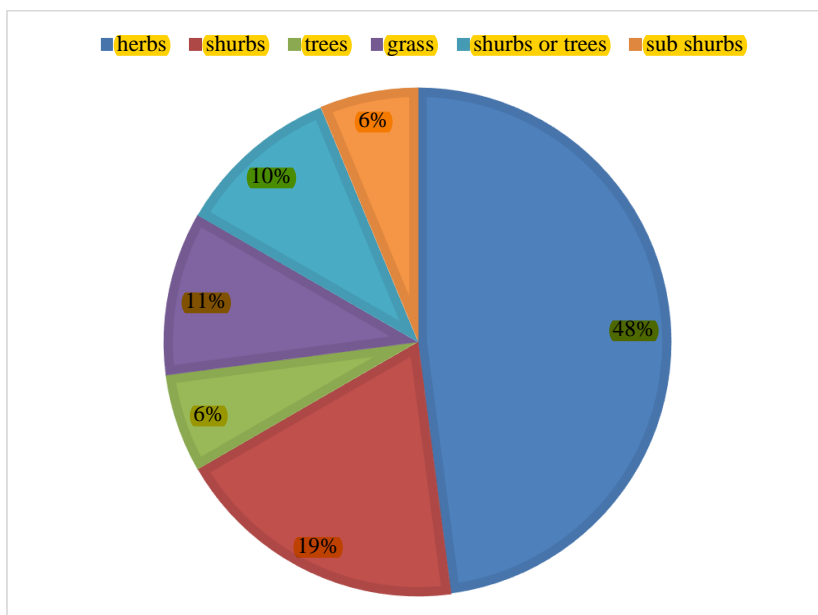

1

2

**Figure 5. Plant growth form of the study area.**

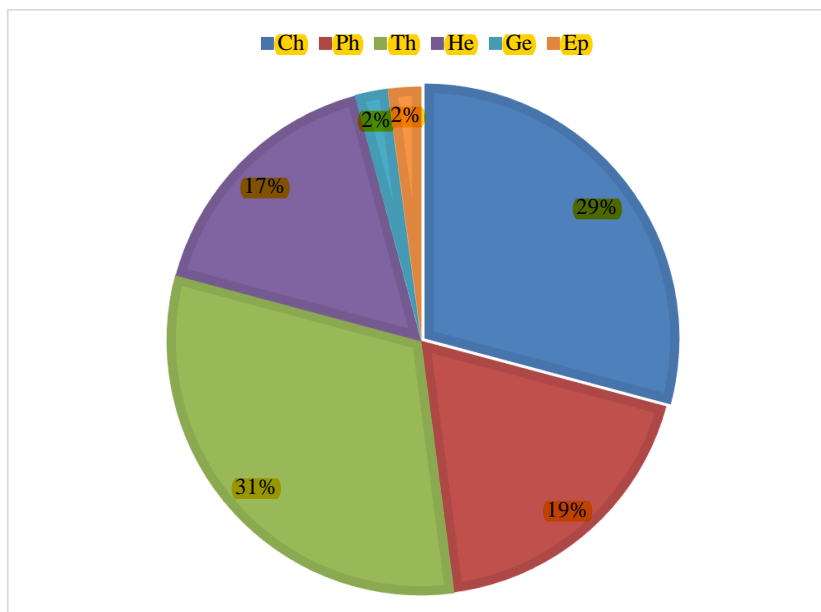

3

4

**Figure 6. Plant life form of the study area.**



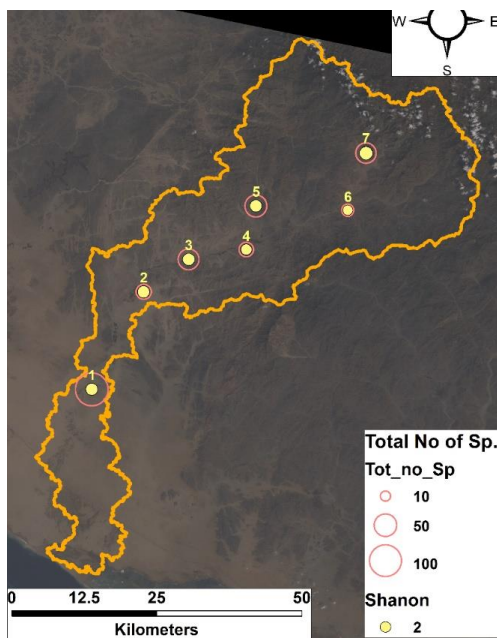

5

6

**Figure 7. Species richness according to Shannon index.**

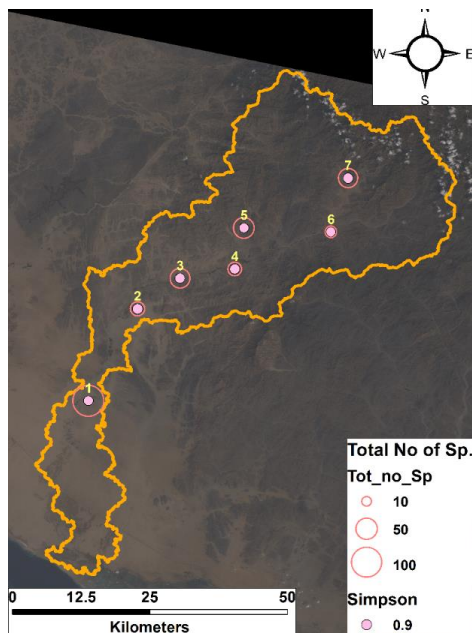

7

8

**Figure 8. Species richness according to Simpson's index.**



9 Normalized Difference Vegetation Index was practiced evaluating the status of Wadi Yalamlam  
10 vegetation cover compared to data obtained four years ago (Figures 9 a & b). NDVI change  
11 detection showed a decrease in vegetation cover. Upper-stream areas of Wadi Yalamlam were  
12 the most fragile parts of the Wadi Basin due to anthropogenic activities (Bahrawi et al., 2016).  
13 The mid-stream section of Wadi Yalamlam showed no significant difference in vegetation cover.  
14 Such stability in vegetation cover is explained by the water availability in the mid-stream section  
15 due to its morphometric features (Elhag et al., 2017). The vegetation cover of the lower section  
16 of Wadi Yalamlam basin was not abundant in both temporal datasets. The lower section has  
17 mainly alluvial deposits occurring frequently due to soil erosion (Elhag, 2016, Bahrawi et al.,  
18 2016).  
19

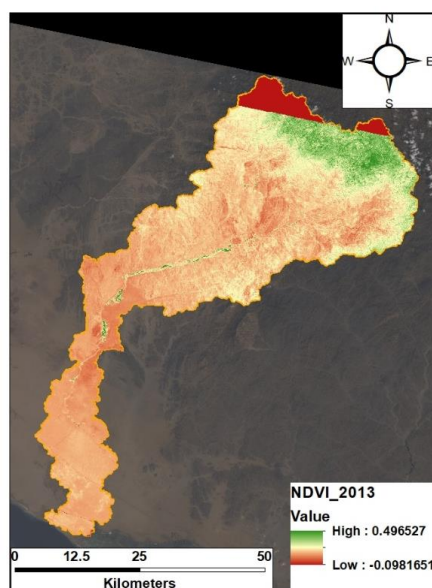

20  
21

Figure 9 a. NDVI thematic map acquired in 2013.

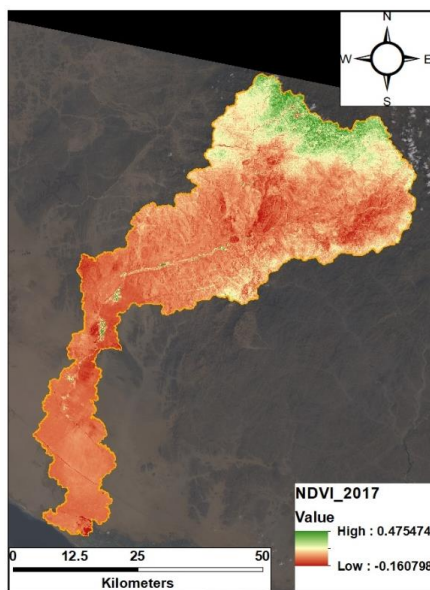

22

23

**Figure 9 b. NDVI thematic map acquired in 2017.**

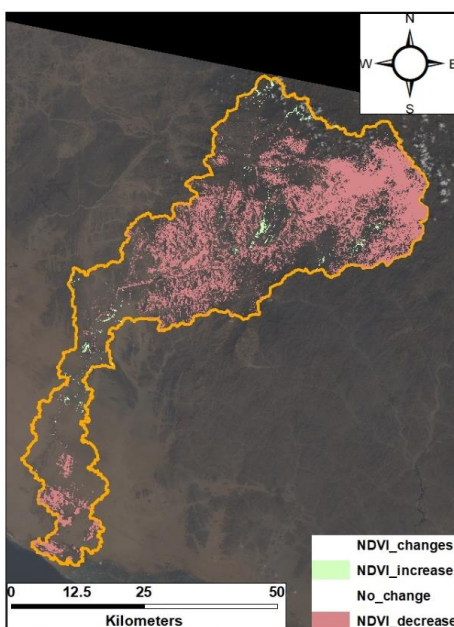

24

25

**Figure 10. NDVI thematic change detection map within the study area.**

26



#### 27 **4. Conclusion**

28 The current research focuses on the species richness and species diversity in the designated study  
29 area. Field surveys in addition to Shannon index examination demonstrate a high species  
30 diversity in different plant growth forms. More investigations shall be carried out to identify the  
31 threatened plant species and to implement effective monitoring plans. The spatial configuration  
32 of the vegetation cover in Wadi Yalamlam shows a significant variation in term of Normalized  
33 Difference Vegetation Index and the species richness indices. The upper-stream section of the  
34 Wadi requires immediate regulation to stop losing the species diversity. Restoration and  
35 rehabilitation schemes shall be adopted in the designated study area. Sediments transport shall be  
36 regulated in the lower-stream section to allow the natural vegetation to success.

37

#### 38 **Acknowledgment**

39 This project was funded by the Deanship of Scientific Research (DSR), King Abdulaziz  
40 University, Jeddah, under Grant no. 235/247/1438G. The author, therefore, acknowledges and  
41 thanks DSR for technical and financial support.

42

#### 43 **References**

44

- 45 ABULFATIH, H. 1992. Vegetation zonation along an altitudinal gradient between sea level and  
46 3000 meters in southwestern Saudi Arabia. *J. KING SAUD UNIV., SCI.*, 4, 57-97.
- 47 ABUZINADA, A. H., AL-WETAID, Y. & AL-BASYOUNI, S. Z. M. 2005. The National  
48 Strategy for Conservation of Biodiversity in the Kingdom of Saudi Arabia. *Prepared and*  
49 *issued by: The National Commission for Wildlife Conservation and Development.*  
50 *Conservation of Biological Diversity, Riyadh, Saudi Arabia.*
- 51 AL-SHERIF, E. A., AYESH, A. M. & RAWI, S. M. 2013. Floristic composition, life form and  
52 chorology of plant life at Khulais region, Western Saudi Arabia. *Pak. J. Bot.*, 45, 29-38.
- 53 AL-TURKI, T. & AL-OLAYAN, H. 2003. Contribution to the flora of Saudi Arabia: Hail  
54 region. *Saudi Journal of Biological Sciences*, 10, 190-222.
- 55 AL-YEMENI, M. 2001. Ecology of some plant communities in Wadi Al-Ammaria, Riyadh,  
56 Saudi Arabia. *Saudi Journal of Biological Sciences*, 8, 145-165.

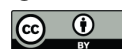

- 57 ALATAR, A., EL-SHEIKH, M. A. & THOMAS, J. 2012. Vegetation analysis of Wadi Al-Jufair,  
58 a hyper-arid region in Najd, Saudi Arabia. *Saudi journal of biological sciences*, 19, 357-  
59 368.
- 60 ALFARHAN, A. 1999. A phytogeographical analysis of the floristic elements in Saudi Arabia.  
61 *Pakistan Journal of Biological Sciences (Pakistan)*.
- 62 ALFARHAN, A. 2001. A floristic account on Raudhat Khuraim Central Province Saudi Arabia.  
63 *Saudi Journal of Biological Sciences*, 8, 80-103.
- 64 ALFARHAN, A. H., AL-TURKI, T. A. & BASAHY, A. Y. 2005. Flora of Jizan Region. *Final*  
65 *Report Supported by King Abdulaziz City for Science and Technology*, 1, 545.
- 66 ALNAFIE, A. H. 2008. Phytogeography of Saudi Arabia. *Saudi Journal of Biological Sciences*,  
67 15, 159-176.
- 68 BAHRAWI, J. A., ELHAG, M., ALDHEBIANI, A. Y., GALAL, H. K., HEGAZY, A. K. &  
69 ALGHAILANI, E. 2016. Soil erosion estimation using remote sensing techniques in wadi  
70 yalamlam basin, Saudi Arabia. *Advances in Materials Science and Engineering*, 2016.
- 71 BARBERO, M., BONIN, G., LOISEL, R. & QUÉZEL, P. 1990. Changes and disturbances of  
72 forest ecosystems caused by human activities in the western part of the Mediterranean  
73 basin. *Vegetatio*, 87, 151-173.
- 74 BHANDARI, A., KUMAR, A. & SINGH, G. 2012. Feature extraction using Normalized  
75 Difference Vegetation Index (NDVI): a case study of Jabalpur city. *Procedia*  
76 *Technology*, 6, 612-621.
- 77 BRAUN-BLANQUET, J., FULLER, G. D., CONARD, H. S. & BLANQUET, J. B. 1965. *Plant*  
78 *Sociology: The Study of Plant Communities. Authorized English Translation of*  
79 *Pflanzensoziologie by J. Braun-Blanquet. Transl., rev. and Ed. by George D. Fuller and*  
80 *Henry S. Conard, Hafner Pub.*
- 81 CAIN, S. A. 1950. Life-forms and phytoclimate. *The Botanical Review*, 16, 1-32.
- 82 CHAUDHARY, S. 1999. Flora of the Kingdom of Saudi Arabia: vol. 1. *Riyadh: Ministry of*  
83 *Agriculture and Water, National Herbarium, National Agriculture and Water Research*  
84 *Center 691p.-illus.. En Icones, Anatomy and morphology, Keys. Geog, 2.*
- 85 CHAUDHARY, S. 2000. Flora of the Kingdom of Saudi Arabia: illustrated volume 2 (part 3).  
86 *Riyadh: Ministry of Agriculture iii, 432p.-illus.. En Icones, Anatomy and morphology,*  
87 *Keys, 2.*
- 88 COLLENETTE, I. 1998. A checklist of botanical species in Saudi Arabia. *Burgess Hill,*  
89 *England: International Asclepiad Society 80p.-. ISBN, 953237605.*
- 90 COLLENETTE, I. S. 1999. Wildflowers of Saudi Arabia. *Riyadh: National Commission for*  
91 *Wildlife Conservation and Development xxxii, 799p.-col. illus.. ISBN, 1370679501.*
- 92 COPE, T. A. 1985. A Key to the Grasses of the Arabian Peninsula (Studies in the Flora of Arabia  
93 XV).
- 94 DAUR, I. 2012. Plant flora in the rangeland of western Saudi Arabia. *Pak. J. Bot*, 44, 23-26.
- 95 DESCHENES, J. 1969. Life form spectra of contrasting slopes of the grazed pastures of  
96 Northern New Jersey. *Naturaliste Canadein*, 96, 965-978.
- 97 EL-DEMERDASH, M., HEGAZY, A. & ZILAY, A. 1994. Distribution of the plant  
98 communities in Tihamah coastal plains of Jazan region, Saudi Arabia. *Plant Ecology*,  
99 112, 141-151.
- 100 EL-GHANEM, W. M. 2006. Ecological study at Wadi Al-Ammaria in El-Riyadh City--Saudi  
101 Arabia. *Bulletin of Pure & Applied Sciences-Botany*, 25, 11-11.



- 102 EL-GHANI, M. M. A. & ABDEL-KHALIK, K. N. 2006. Floristic Diversity and  
103 Phytogeography of the Gebel Elba National Park, South-East Egypt. *Turkish Journal of*  
104 *Botany*, 30, 121-136.
- 105 EL-GHANI, M. M. A. & EL-SAWAF, N. 2004. Diversity and distribution of plant species in  
106 agro-ecosystems of Egypt. *Systematics and Geography of Plants*, 319-336.
- 107 EL-GHANIM, W. M., HASSAN, L. M., GALAL, T. M. & BADR, A. 2010. Floristic  
108 composition and vegetation analysis in Hail region north of central Saudi Arabia. *Saudi*  
109 *journal of biological sciences*, 17, 119-128.
- 110 EL-KADY, H., AYYAD, M. & BORNKAMM, R. 1995. Vegetation and recent land-use history  
111 in the desert of Maktala, Egypt. (Conference paper). *Advances in Geoecology (Germany)*.
- 112 ELHAG, M. 2016. Detection of Temporal Changes of Eastern Coast of Saudi Arabia for Better  
113 Natural Resources Management. *Indian Journal of Geo-Marine Sciences*, 45, 29-37.
- 114 ELHAG, M. & BAHRAWI, J. A. 2016. Consideration of geo-statistical analysis in soil pollution  
115 assessment caused by leachate breakout in the municipality of Thermi, Greece.  
116 *Desalination and Water Treatment*, 57, 27879-27889.
- 117 ELHAG, M. & BAHRAWI, J. A. 2017. Soil salinity mapping and hydrological drought indices  
118 assessment in arid environments based on remote sensing techniques. *Geoscientific*  
119 *Instrumentation, Methods and Data Systems*, 6, 149.
- 120 ELHAG, M., GALAL, H. K. & ALSUBAIE, H. 2017. Understanding of morphometric features  
121 for adequate water resource management in arid environments. *Geoscientific*  
122 *Instrumentation, Methods and Data Systems*, 6, 293.
- 123 FORBIS, T. A., PROVENCHER, L., FRID, L. & MEDLYN, G. 2006. Great Basin land  
124 management planning using ecological modeling. *Environmental Management*, 38, 62-  
125 83.
- 126 FRANKLIN, J. 1995. Predictive vegetation mapping: geographic modelling of biospatial  
127 patterns in relation to environmental gradients. *Progress in physical geography*, 19, 474-  
128 499.
- 129 GHAZANFAR, S. A. 2006. Saline and alkaline vegetation of NE Africa and the Arabian  
130 peninsula: An overview. *Biosaline Agriculture and Salinity Tolerance in Plants*.  
131 Springer.
- 132 GUISAN, A. & ZIMMERMANN, N. E. 2000. Predictive habitat distribution models in ecology.  
133 *Ecological modelling*, 135, 147-186.
- 134 HEATH, J. K. & SMITH, A. G. 1989. Growth factors in embryogenesis. *British medical*  
135 *bulletin*, 45, 319-336.
- 136 HEGAZY, A., LOVETT-DOUST, J., HAMMOUDA, O. & GOMAA, N. 2007. Vegetation  
137 distribution along the altitudinal gradient in the northwestern Red Sea region. *Community*  
138 *Ecology*, 8, 151-162.
- 139 HEIP, C. H., HERMAN, P. M. & SOETAERT, K. 1998. Indices of diversity and evenness.  
140 *Oceanis*, 24, 61-88.
- 141 HOSNI, H. A. & HEGAZY, A. K. 1996. Contribution to the flora of Asir, Saudi Arabia.  
142 *Candollea*, 51, 169-202.
- 143 HUNTER, P. R. & GASTON, M. A. 1988. Numerical index of the discriminatory ability of  
144 typing systems: an application of Simpson's index of diversity. *Journal of clinical*  
145 *microbiology*, 26, 2465-2466.





- 146 JENSEN, R. & BINFORD, M. 2004. Measurement and comparison of Leaf Area Index  
147 estimators derived from satellite remote sensing techniques. *International Journal of*  
148 *Remote Sensing*, 25, 4251-4265.
- 149 KHALIK, K. A., EL-SHEIKH, M. & EL-AIDAROUS, A. 2013. Floristic diversity and  
150 vegetation analysis of wadi Al-Noman, Mecca, Saudi Arabia. *Turkish Journal of botany*,  
151 37, 894-907.
- 152 LENSSEN, J., MENTING, F., VAN DER PUTTEN, W. & BLOM, K. 1999. Control of plant  
153 species richness and zonation of functional groups along a freshwater flooding gradient.  
154 *Oikos*, 523-534.
- 155 LLOYD, M., ZAR, J. H. & KARR, J. R. 1968. On the calculation of information-theoretical  
156 measures of diversity. *American Midland Naturalist*, 257-272.
- 157 MACDONALD, G. M. & MACDONALD, G. M. 2003. *Biogeography: space, time and life*.
- 158 MARGALEF, R. 1972. Homage to Evelyn Hutchinson, or why there is an upper limit to  
159 diversity.
- 160 MASRAHI, Y., AL-HUQAIL, A., AL-TURKI, T. & THOMAS, J. 2012. *Odyssea mucronata*,  
161 *Sesbania sericea*, and *Sesamum alatum*—new discoveries for the flora of Saudi Arabia.  
162 *Turkish Journal of Botany*, 36, 39-48.
- 163 MEURANT, G. 2012. *An Introduction to Numerical Classification*, Elsevier.
- 164 MIGAHID, A. M. 1978. Flora of Saudi Arabia.
- 165 MOSALLAM, H. 2007. Comparative study on the vegetation of protected and non-protected  
166 areas, Sudera, Taif, Saudi Arabia. *International Journal of Agriculture and Biology*  
167 (*Pakistan*).
- 168 MUELLER-DOMBOIS, D. & ELLENBERG, H. 1974. Aims and methods of vegetation  
169 ecology.
- 170 NARDI, P., DI MATTEO, G., PALAHI, M. & SCARASCIA MUGNOZZA, G. 2016. Structure  
171 and Evolution of Mediterranean Forest Research: A Science Mapping Approach. *PLoS*  
172 *One*, 11, e0155016.
- 173 PIELOU, E. C. 1966. The measurement of diversity in different types of biological collections.  
174 *Journal of theoretical biology*, 13, 131-144.
- 175 RAHMAN, M. A., MOSSA, J. S., AL-SAID, M. S. & AL-YAHYA, M. A. 2004. Medicinal  
176 plant diversity in the flora of Saudi Arabia 1: a report on seven plant families.  
177 *Fitoterapia*, 75, 149-161.
- 178 SCHULZ, E. & WHITNEY, J. 1986. Vegetation in north-central Saudi Arabia. *Journal of arid*  
179 *environments*.
- 180 SHALTOUT, K., EL-HALAWANY, E. & EL-GARAWANY, M. 1997. Coastal lowland  
181 vegetation of eastern Saudi Arabia. *Biodiversity and Conservation*, 6, 1027-1040.
- 182 SHALTOUT, K. & MADY, M. 1996. Analysis of raudhas vegetation in central Saudi Arabia.  
183 *Journal of Arid Environments*, 34, 441-454.
- 184 SHARAF EL DIN, A., EL KADY, H., SHALTOUT, K. & MADI, M. 1999. Nutritive value of  
185 the raudhas plants in central Saudi Arabia. *Arab Gulf J. Sci. Res*, 16, 537-553.
- 186 SUBYANI, N. & BAYUMI, N. 2003. Evaluation of groundwater resources in Wadi Yalamlam  
187 basin, Makkah area.
- 188 TAIA, W. & EL-GHANEM, W. 2001. City vegetation analysis of three habitats at El-Riyadh.  
189 *Bulletin of Pure and Applied Sciences B*, 20, 53-65.



- 190 THOMAS, J., ALFARHAN, A., ALI, A., MILLER, A. & OTHMAN, L. 2008. An account on  
191 the eastern limits of Afro-Arabian plants in South Asia. *Basic and Applied Dryland*  
192 *Research*, 2, 12-22.
- 193 ZHANG, Y., CHEN, Y. & PAN, B. 2005. Distribution and floristics of desert plant communities  
194 in the lower reaches of Tarim River, southern Xinjiang, People's Republic of China.  
195 *Journal of Arid Environments*, 63, 772-784.
- 196  
197
